# Supplementary material for: Change in grounding line location on the Antarctic Peninsula measured using a tidal motion offset correlation method
Source: Copernicus journal article supplement (doi:10.5194/tc-18-4723-2024), 2024-10-18
Supplement: Supplementary file 1 [file tc-18-4723-2024-supplement.pdf]

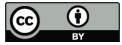

*Supplement of*

## **Change in grounding line location on the Antarctic Peninsula measured using a tidal motion offset correlation method**

**Benjamin J. Wallis et al.**

*Correspondence to:* Benjamin J. Wallis (eebjwa@leeds.ac.uk)

The copyright of individual parts of the supplement might differ from the article licence.

| Sentinel-1 track | Frames                                         |
|------------------|------------------------------------------------|
| 037              | 0856, 0862                                     |
| 038              | 0808, 0813, 0818, 0823, 0828, 0833, 0838, 0843 |
| 052              | 0840, 0846, 0851                               |
| 082              | 0807, 0813, 0818, 0823, 0828, 0833             |
| 169              | 0825, 0831, 0836, 0841, 0846                   |

**Table S1.** List of Sentinel-1 SAR frames used to compile the TMOC Antarctic Peninsula tide correlation grounding line data.

| Region                     | Sentinel-1 Track | Sentinel-1 Frame | DInSAR constituent dates               |
|----------------------------|------------------|------------------|----------------------------------------|
| Larsen B Ice Shelf Remnant | 038              | 0818             | 18/09/2019<br>24/09/2019<br>30/09/2019 |
| Larsen C Ice Shelf         | 038              | 0818             | 18/09/2019<br>24/09/2019<br>30/09/2019 |
|                            |                  | 0823             | 14/07/2019<br>20/07/2019<br>26/07/2019 |
|                            |                  | 0828             | 02/02/2019<br>08/02/2019<br>14/02/2019 |
| Larsen D Ice Shelf         | 052              | 0846             | 09/02/2019<br>15/02/2019<br>21/02/2019 |
| George VI Ice Shelf        | 169              | 0841             | 23/02/2019<br>01/03/2019<br>07/03/2019 |
|                            |                  | 0846             | 23/02/2019<br>01/03/2019<br>07/03/2019 |

5 **Table S2.** Sentinel-1 SAR IW mode image frames and acquisition dates used to produce differential interferograms for this study.

| Glacier    | Grounding line change 2019-2020 w.r.t. (km inland) |                       |                   |
|------------|----------------------------------------------------|-----------------------|-------------------|
|            | MEaSURES AB                                        | MEaSURES InSAR (1996) | ASAID (1999-2003) |
| Hektoria   | 11.7                                               | 16.3                  | 13.8              |
| Green      | 4.4                                                | 9.3                   | 6.3               |
| Evans      | 3.3                                                | 6.7                   | 6.7               |
| Edgeworth  | 8.3                                                | -                     | 3.8               |
| Bombardier | 4.4                                                | -                     | 0.0               |
| Dinsmoor   | 4.2                                                | -                     | 0.7               |
| Crane      | -1.0                                               | 3.6                   | 0.5               |

**Table S3.** Grounding line location change for the Larsen-A and -B embayment glaciers shown in Fig. 5. Change measured in 2019-20 with respect to MEaSURES Antarctic Boundaries v2 (Mouginot et al., 2017), MEaSURES DInSAR (Rignot et al., 2016) and ASAID (Bindschadler et al., 2011) grounding line datasets.

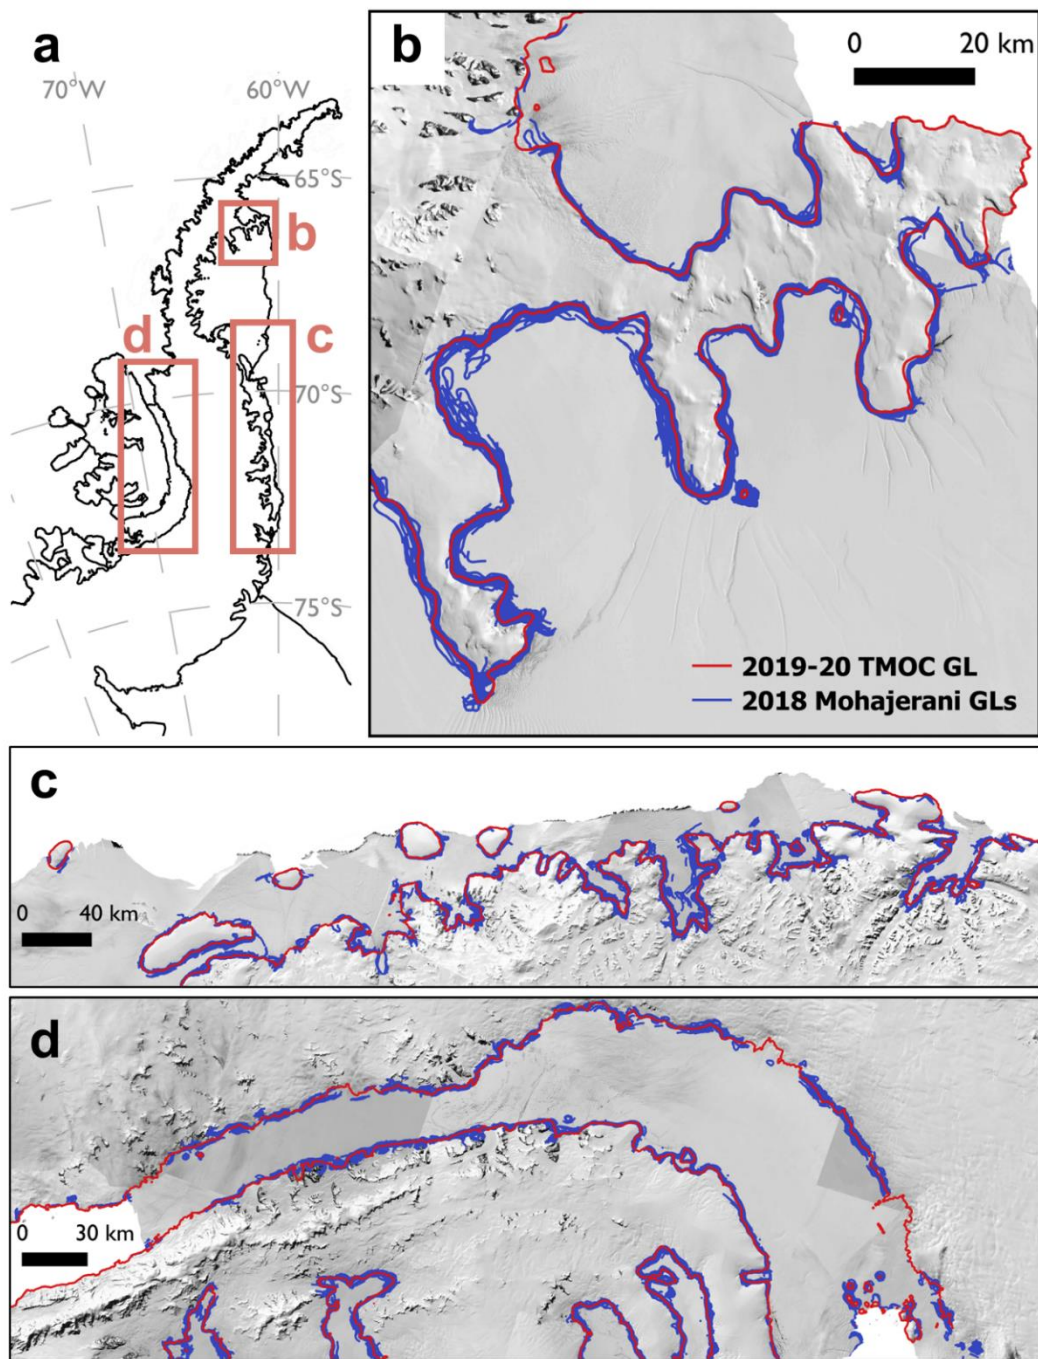

**Figure S1.** Comparison between 2019-2020 TMOC grounding line (GL) and the set of grounding lines from Mohajerani et al. 2021. **(a)** Overview map of the Antarctic Peninsula. Coastline and grounding line from MEaSUREs Antarctic Boundaries v2 (Mouginot et al., 2017). **(b)** Insert of the Jason Peninsula, **(c)** Larsen-D Ice Shelf, **(d)** George VI Ice Shelf all showing the 2019-2020 TMOC GL (red) and the set of GLs from Mohajerani et al. 2021 (blue), Background image is LIMA Landsat mosaic (Bindschadler et al. 2008).

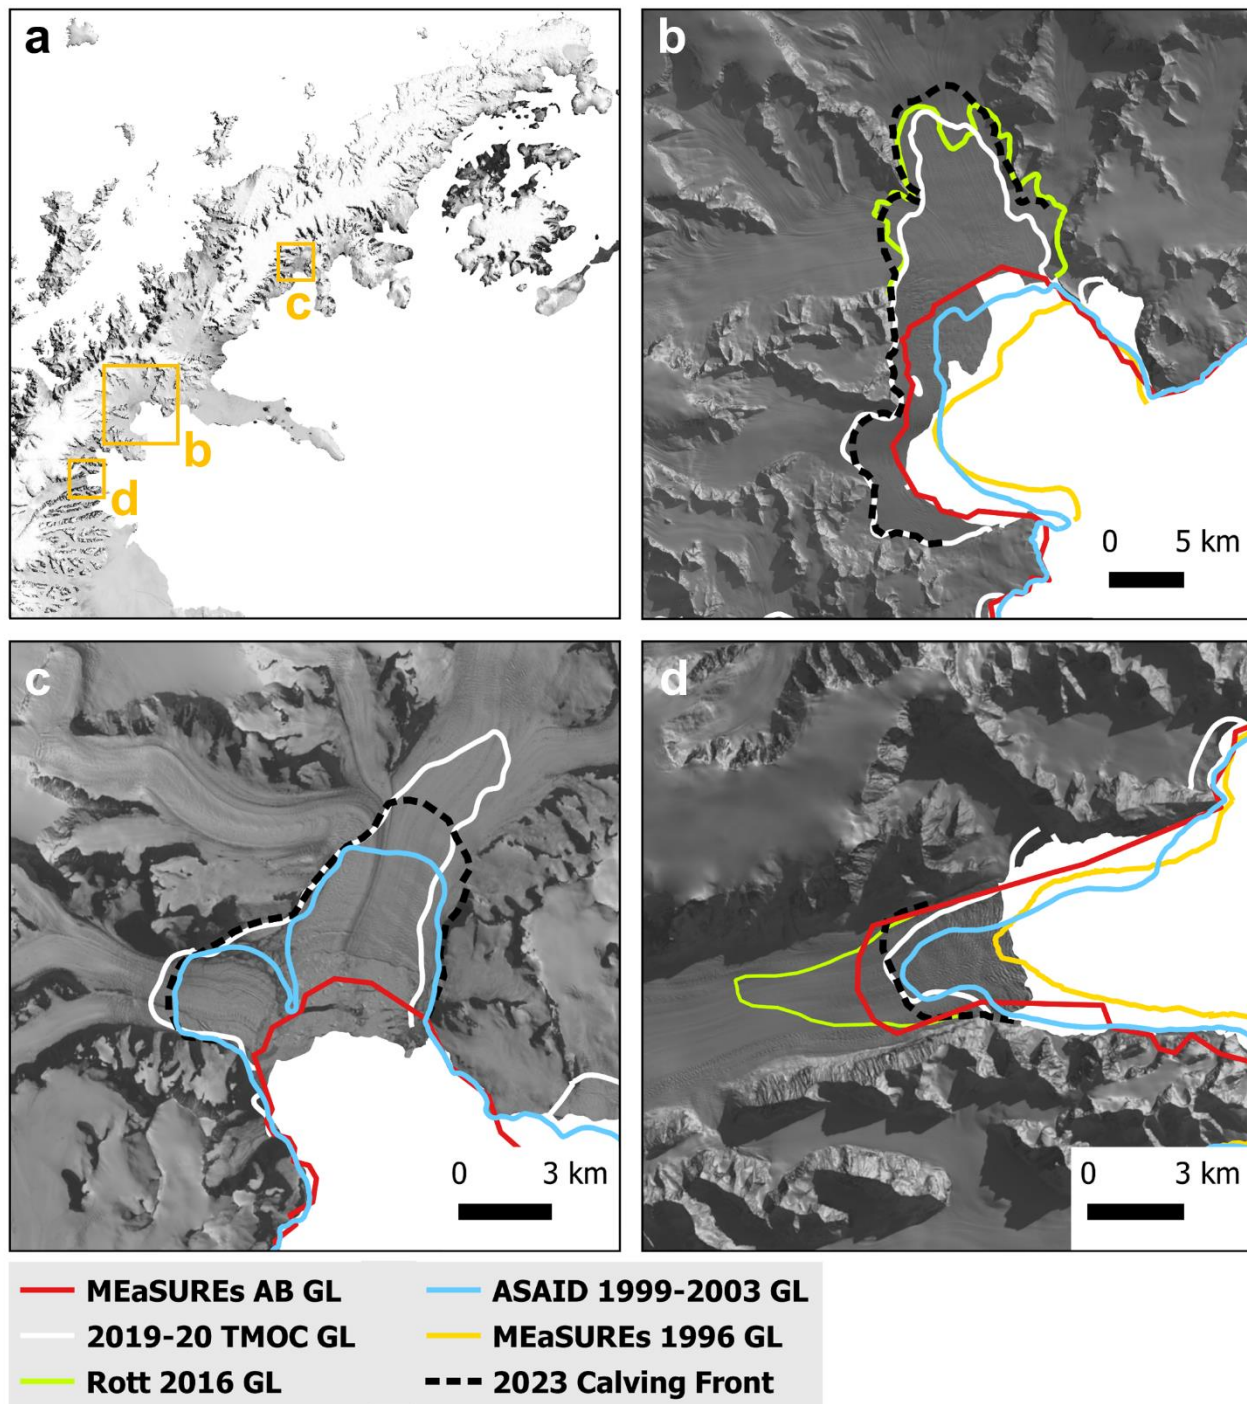

**Figure S2.** Detailed grounding line location maps for glaciers in the Larsen-A and -B Inlets shown in Figure 5. (a) Overview map of the northern Antarctic Peninsula with the LIMA Landsat mosaic used as a base-map (Bindschadler et al., 2008). (a) Hektor-Green-Evans Glacier system GL location with a Landsat-8 base-map from 21/12/2021. (b) Edgeworth-Bombardier-Dinsmoor Glacier system GL location with a Landsat-8 base-map from 21/12/2021. (d) Crane Glacier GL location with a Landsat-8 base-map from 22/09/2020. All maps use a sea-mask from the British Antarctic Survey 2020 coastline (Gerrish, 2020).
